# Supplementary material
Source: HighWire-hosted journal article supplement (https://bmjopen.bmj.com/content/8/4/e016766)
Supplement: inline-supplementary-material-2 [file inline-supplementary-material-2.pdf]

# Supplementary material B – Supporting information for the long term modelling

## Table of Contents

|     |                                                                                                                   |    |
|-----|-------------------------------------------------------------------------------------------------------------------|----|
| 1   | Determining the number of PSA runs.....                                                                           | 1  |
| 2   | Determining the number of simulated individuals to use in each run.....                                           | 1  |
| 3   | Other cause mortality .....                                                                                       | 1  |
| 4   | Probability of death from end stage renal disease.....                                                            | 1  |
| 5   | The clinical effectiveness parameters .....                                                                       | 2  |
| 5.1 | Treatment switching.....                                                                                          | 2  |
| 5.2 | HbA1c.....                                                                                                        | 14 |
| 5.3 | DKA and severe hypoglycaemia.....                                                                                 | 21 |
| 6   | The cost of insulin, diabetes related contacts and insulin pumps used in the Sheffield Type 1 Diabetes model..... | 25 |
| 7   | Detailed results of the scenario and subgroup analyses .....                                                      | 32 |

## List of Tables

|                                                                                                                                                                                                           |    |
|-----------------------------------------------------------------------------------------------------------------------------------------------------------------------------------------------------------|----|
| Table 1: The results of the parametric survival models fitted to patients allocated to the continuous subcutaneous insulin infusion dose adjustment for normal eating arm of the REPOSE trial (n=130) ... | 4  |
| Table 2: The results of the parametric survival models fitted to patients allocated to the multiple daily injections with dose adjustment for normal eating arm of the REPOSE trial (n=128) .....         | 6  |
| Table 3: A summary of the Akaike information criterion and the Bayesian information criterion for the fitted survival curves used in the long term modelling .....                                        | 8  |
| Table 4: The variance – covariance matrix for the exponential model fitted to the pumps arm.....                                                                                                          | 11 |
| Table 5: The variance – covariance matrix for the exponential model fitted to the multiple daily injections arm.....                                                                                      | 11 |
| Table 6: The variance – covariance matrix for the weibull model fitted to the pumps arm .....                                                                                                             | 11 |
| Table 7: The variance – covariance matrix for the weibull model fitted to the multiple daily injections arm .....                                                                                         | 11 |
| Table 8: The variance – covariance matrix for the gompertz model fitted to the pumps arm .....                                                                                                            | 11 |
| Table 9: The variance-covariance matrix for the gompertz model fitted to the multiple daily injections arm .....                                                                                          | 12 |
| Table 10: The variance – covariance matrix for the log-logistic model fitted to the pumps arm .....                                                                                                       | 12 |
| Table 11: The variance – covariance matrix for the log-logistic model fitted to the multiple daily injections arm.....                                                                                    | 12 |
| Table 12: The variance – covariance matrix for the log-normal model fitted to the pumps arm.....                                                                                                          | 12 |
| Table 13: The variance – covariance matrix for the log-normal model fitted to the multiple daily injections arm.....                                                                                      | 13 |
| Table 14: The effect of continuous subcutaneous insulin infusion compared to multiple daily injections for all individuals in the intention to treat population. ....                                     | 15 |

|                                                                                                                                                                                         |    |
|-----------------------------------------------------------------------------------------------------------------------------------------------------------------------------------------|----|
| Table 15: The effect of continuous subcutaneous insulin infusion compared to multiple daily injections for all individuals in the per protocol population. ....                         | 16 |
| Table 18: The variance covariance matrix for the beta regression to predict one year HbA1c in the ITT population .....                                                                  | 17 |
| Table 19: The variance covariance matrix for the beta regression to predict two year HbA1c in the ITT population .....                                                                  | 18 |
| Table 16: The variance covariance matrix for the beta regression to predict one year HbA1c in the per protocol population .....                                                         | 19 |
| Table 17: The variance covariance matrix for the beta regression to predict two year HbA1c in the per protocol population .....                                                         | 20 |
| Table 20: A summary of the observed incidence of diabetic ketoacidosis and severe hypoglycaemia in the intention to treat population .....                                              | 22 |
| Table 21: The negative binomial model fitted to the incidence of severe hypoglycaemia at one year and two years .....                                                                   | 24 |
| Table 22: The negative binomial model fitted to the incidence of diabetic ketoacidosis at one and two years .....                                                                       | 24 |
| Table 23: The unit costs of insulin.....                                                                                                                                                | 25 |
| Table 24: The variance covariance matrix for the seemingly unrelated regression on insulin costs in year 1 and 2 of REPOSE.....                                                         | 29 |
| Table 25: The variance covariance matrix for the seemingly unrelated regression on the cost of diabetes related contacts with health care professionals in year 1 and 2 of REPOSE ..... | 30 |
| Table 26: The variance covariance matrix for the seemingly unrelated regression on the cost of insulin pumps and associated consumables in year 1 and 2 of REPOSE .....                 | 31 |
| Table 27: The One way scenario analyses and subgroup analyses performed using the Sheffield Type 1 Diabetes Policy Model.....                                                           | 32 |

## List of Figures

|                                                                                                                                                                                                                                  |    |
|----------------------------------------------------------------------------------------------------------------------------------------------------------------------------------------------------------------------------------|----|
| Figure 1: A visual plot of the Kaplan-Meier and survival curves estimated from parametric models for those individuals who were randomised continuous subcutaneous insulin infusion with dose adjustment for normal eating ..... | 9  |
| Figure 2: A visual plot of the Kaplan-Meier and survival curves estimated from parametric models for those individuals who were randomised multiple daily injections with dose adjustment for normal eating.....                 | 10 |

## List of abbreviations in this supplementary material

| Abbreviation | Definition                         |
|--------------|------------------------------------|
| iNMB         | Incremental net monetary benefit   |
| QALY         | Quality adjusted life year         |
| PSA          | Probabilistic sensitivity analysis |
| UK           | United Kingdom                     |
| ESRD         | End stage renal disease            |
| DKA          | Diabetic ketoacidosis              |
| Pumps        | Insulin pumps                      |
| MDI          | Multiple Daily Injections          |
| DAFNE        | Dose adjustment for normal eating  |
| T1DM         | Type 1 diabetes mellitus           |

AIC  
BIC  
ITT  
DCCT

Akaike information criterion  
Bayesian information criterion  
Intention to treat  
Diabetes Control and Complications Trial

## 1 Determining the number of PSA runs

The stability of the model results was assessed in terms of the stability of incremental net monetary benefit (iNMB) using a threshold cost per quality adjusted life year (QALY) of £20,000 per QALY gained. This statistic is useful for the purpose of assessing model stability as, so long as the mean iNMB is statistically significantly different from 0 at the 5% level then the results are sufficiently stable that any decision made as a consequence of them will not change.

$Z_i$  = the iNMB for each PSA run

$N$  = the number of PSA simulations

The mean iNMB is given by:  $\bar{Z} = \frac{1}{N} \sum_{i=1}^N Z_i$

The variance in mean iNMB is given by:  $Var(\bar{Z}) = \frac{1}{N-1} \sum_{i=1}^n (Z_i - \bar{Z})^2$

The standard error of the mean iNMB is given by:  $Standard\ error(\bar{Z}) = \sqrt{Var(\bar{Z})/N}$

The mean incremental net monetary benefit at £20,000 per QALY gained was -£16,201 ( $\bar{Z}$ ). The variance of this was 2.18E+08. The standard error was  $\sqrt{2.18E + 8/500} = 661$ . As the standard error was under 5% of the mean incremental net monetary benefit, 500 probabilistic sensitivity analysis (PSA) runs was determined to be sufficiently robust for making reliable decisions for these comparators

## 2 Determining the number of simulated individuals to use in each run

Likewise to determine the stability of the ICER in the deterministic results and the scenario analyses the stability of the iNMB was assessed over 5,00 simulated individuals. The model was run initially using the same 5,000 simulated individuals in each arm of the deterministic base case. The mean incremental net monetary benefit at £20,000 per QALY gained was -£15,759 ( $\bar{Z}$ ). The variance of this was 1.27E+10. The standard error was  $\sqrt{1.27E + 10/5000} = 1,594$ . As the standard error was approximately 10% of the mean incremental net monetary benefit, 5000 simulated individuals was determined to be sufficient to produce stable results for the analyses.

## 3 Other cause mortality

Individuals can also die from other causes. This other-cause mortality was updated in version of the model used for these analyses. Other-cause mortality was calculated using UK life tables from 2012 to 2014 adjusted to exclude the causes either attributed to diabetes mellitus (either type 1, type 2 or unspecified, ICD-10 codes E10-14) or modelled directly in the microvascular and macrovascular disease components (deaths due to: end stage renal disease; myocardial infarction, stroke and heart failure, ICD-10 codes N18, I20-21, I61-64, I50).<sup>1-4</sup>

## 4 Probability of death from end stage renal disease

This model parameter was altered from the value reported in Heller *et al.*<sup>5</sup> to reflect directly observable data available in Wolfe *et al.*<sup>6</sup> on the probability of end stage renal disease. At baseline, 102,163 patients with diabetes were receiving dialysis and over a maximum follow up of 6 years 44,916 of these patients died. This gave a probability of death from end stage renal disease (ESRD) of 44.00% over 6 years. In the model probabilistic sensitivity analysis, the uncertainty in this probability was parameterised using a beta distribution with an alpha parameter of 44,916 and a beta parameter of 57,247. The probability of death from end stage renal disease over 6 years was first converted into an instantaneous rate of death and then yearly probability of death from end stage renal disease using the method in Briggs *et al.*<sup>7</sup>

## 5 The clinical effectiveness parameters

### 5.1 Treatment switching

The treatment switching curves were used to estimate the incidence of treatment switching in the model in the first and second year. Covariates were used in the parametric models to control for: HbA1c prior to switching, number of diabetic ketoacidosis events (DKAs) and number of severe hypoglycaemic events in the year prior to switching (or at 2 years follow up if no switching occurred). The standard errors of the parametric survival models were adjusted for clustering in each DAFNE course. As separate models were fitted to the insulin pumps + dose adjustment for normal eating (pumps+DAFNE) and the multiple daily injections + dose adjustment for normal eating (MDI+DAFNE) arm, no assumption of proportional hazards or accelerated failure time was made.

The curves were not extrapolated, as the clinical expert opinion of a Professor of Clinical Diabetes & Honorary Consultant Physician and a Professor in Public Health & Health Technology Assessment was that if an individual was still using a pump after two years that they would continue to use pump as in their experience once an adult with type 1 diabetes mellitus (T1DM) was successfully using an insulin pump they were unlikely change their insulin delivery method.

The different parameters of the parametric survival models fitted to the pumps+DAFNE arm is given in Table 1. The equivalent parameters are given for the MDI+DAFNE arm in Table 2.

The goodness of fit of the parametric survival curves were assessed using the Akaike information criterion (AIC), Bayesian information criterion (BIC) and a visual assessment of the survival curves estimated from parametric models plotted against the nonparametric Kaplan-Meier curve. The one and two-year time points are the time points of relevance for assessing the visual fit of the curves in this analysis, as the model uses a yearly time cycle so treatment switching is only predicted in the model at these time points. The AIC and the BIC are given in Table 3. Lower values for these statistics indicate a better model fit. For the pumps+DAFNE arm, the exponential model has the lowest AIC and BIC. For the MDI+DAFNE arm, the Weibull model had the lowest AIC and the exponential model has the lowest BIC. The plot of the parametric survival curves against the underlying Kaplan-Meier curve are provided in Figures 1 and 2. It is clear that the exponential model provides a reasonable fit to the Kaplan-Meier for the pumps+DAFNE arm at the one and two-year time points therefore this curve was used in the base case economic model. It is also clear that for the MDI+DAFNE arm, the exponential curve does not provide a reasonable fit to the Kaplan-Meier curve at one year whereas the Weibull curve provides a reasonable fit at both one and two years. Therefore the Weibull curve was used as the base case curve for the MDI+DAFNE model arm.

The uncertainty in the parametric survival curves was included in the model's probabilistic sensitivity analysis using a multivariate normal distribution. The variance-covariance matrices and the predicted

coefficients for each of the parametric survival models were used to parameterise the multivariate normal distributions. The coefficients are given in Table 1 and Table 2 respectively and the variance – covariance matrices for each of the parametric curves is given in Tables 4 to Table **13**.

Table 1: The results of the parametric survival models fitted to patients allocated to the pumps with dose adjustment for normal eating arm of the REPOSE trial (n=130)

| Parameter                                                                                                                                                                                             | Coefficient<br>t | Robust<br>standard<br>error | 95% confidence interval |        |
|-------------------------------------------------------------------------------------------------------------------------------------------------------------------------------------------------------|------------------|-----------------------------|-------------------------|--------|
| Exponential model<br>S(t) = Exp(-Exp(FV)*time),<br>FV = 0.222*HbA1c+-0.972*number of DKAs + 0.427*number of severe hypos -4.616                                                                       |                  |                             |                         |        |
| HbA1c                                                                                                                                                                                                 | 0.222            | 0.241                       | -0.251                  | 0.695  |
| Number of DKAs                                                                                                                                                                                        | -0.972           | 0.474                       | -1.901                  | -0.042 |
| Number of severe hypoglycaemic<br>events                                                                                                                                                              | 0.427            | 0.087                       | 0.257                   | 0.598  |
| Constant                                                                                                                                                                                              | -4.616           | 2.125                       | -8.781                  | -0.451 |
| Weibull model<br>S(t) = Exp( -Exp(FV)*time^Exp(Ln Scale))<br>FV = 0.221*HbA1c+-0.981*number of DKAs + 4.460*number of severe hypos -4.460                                                             |                  |                             |                         |        |
| HbA1c                                                                                                                                                                                                 | 0.221            | 0.234                       | 0.016                   | 0.694  |
| Number of DKAs                                                                                                                                                                                        | -0.981           | 0.471                       | -7.113                  | -4.910 |
| Number of severe hypoglycaemic<br>events                                                                                                                                                              | 0.404            | 0.085                       | 0.337                   | 0.684  |
| Constant                                                                                                                                                                                              | -4.460           | 2.100                       | -10.607                 | -4.696 |
| Ln Scale                                                                                                                                                                                              | -0.258           | 0.220                       | 0.111                   | 1.377  |
| Gompertz model<br>S(t) = (-Exp(FV)* (1/Gamma))*(Exp(Gamma*time)-1)<br>FV = = 0.220*HbA1c+-0.983*number of DKAs + 0.407*number of severe hypos -4.307                                                  |                  |                             |                         |        |
| HbA1c                                                                                                                                                                                                 | 0.220            | 0.236                       | -0.243                  | 0.684  |
| Number of DKAs                                                                                                                                                                                        | -0.983           | 0.468                       | -1.901                  | -0.065 |
| Number of severe hypoglycaemic<br>events                                                                                                                                                              | 0.407            | 0.090                       | 0.230                   | 0.584  |
| Constant                                                                                                                                                                                              | -4.307           | 2.232                       | -8.682                  | 0.068  |
| Gamma                                                                                                                                                                                                 | -0.316           | 0.479                       | -1.256                  | 0.624  |
| Log logistic model<br>S(t) = 1/ (1+(1/Exp(FV)*time)^(1/Exp(Gamma))<br>FV = -0.294*HbA1c+1.406*number of DKAs + -0.554*number of severe hypos +5.637                                                   |                  |                             |                         |        |
| HbA1c                                                                                                                                                                                                 | -0.294           | 0.286                       | -0.855                  | 0.267  |
| Number of DKAs                                                                                                                                                                                        | 1.406            | 0.676                       | 0.081                   | 2.730  |
| Number of severe hypoglycaemic<br>events                                                                                                                                                              | -0.554           | 0.170                       | -0.887                  | -0.220 |
| Constant                                                                                                                                                                                              | 5.637            | 2.510                       | 0.718                   | 10.557 |
| Gamma                                                                                                                                                                                                 | 0.215            | 0.230                       | -0.235                  | 0.665  |
| Log normal model<br>S(t) = 1 – Φ ( (ln(time) – FV)/ Standard Deviation), were Φ is the standard normal distribution<br>FV = -0.307*HbA1c+ 1.867*number of DKAs + -0.656*number of severe hypos +6.406 |                  |                             |                         |        |
| HbA1c                                                                                                                                                                                                 | -0.307           | 0.292                       | -0.879                  | 0.264  |
| Number of DKAs                                                                                                                                                                                        | 1.867            | 0.755                       | 0.387                   | 3.347  |
| Number of severe hypoglycaemic<br>events                                                                                                                                                              | -0.656           | 0.180                       | -1.009                  | -0.304 |
| Constant                                                                                                                                                                                              | 6.406            | 2.520                       | 1.466                   | 11.346 |
| St Dev                                                                                                                                                                                                | 1.002            | 0.206                       | 0.598                   | 1.405  |

---

DKA, diabetic ketoacidosis; ln, natural logarithm



Table 2: The results of the parametric survival models fitted to patients allocated to the multiple daily injections with dose adjustment for normal eating arm of the REPOSE trial (n=128)

| Parameter                                                                                                                                                                                             | Coefficient<br>t | Robust<br>standard<br>error | 95% confidence interval |        |
|-------------------------------------------------------------------------------------------------------------------------------------------------------------------------------------------------------|------------------|-----------------------------|-------------------------|--------|
| Exponential model<br>S(t) = Exp(-Exp(FV)*time),<br>FV = 0.336*HbA1c+-5.555*number of DKAs + 0.460*number of severe hypos -6.725                                                                       |                  |                             |                         |        |
| HbA1c                                                                                                                                                                                                 | 0.336            | 0.164                       | 0.014                   | 0.657  |
| Number of DKAs                                                                                                                                                                                        | -5.555           | 0.561                       | -6.655                  | -4.455 |
| Number of severe hypoglycaemic events                                                                                                                                                                 | 0.460            | 0.074                       | 0.315                   | 0.605  |
| Constant                                                                                                                                                                                              | -6.725           | 1.450                       | -9.567                  | -3.884 |
| Weibull model<br>S(t) = Exp( -Exp(FV)*time^Exp(Ln Scale))<br>FV = 0.335*HbA1c+-6.012*number of DKAs + 0.510*number of severe hypos -7.652                                                             |                  |                             |                         |        |
| HbA1c                                                                                                                                                                                                 | 0.355            | 0.173                       | 0.016                   | 0.694  |
| Number of DKAs                                                                                                                                                                                        | -6.012           | 0.562                       | -7.113                  | -4.910 |
| Number of severe hypoglycaemic events                                                                                                                                                                 | 0.510            | 0.089                       | 0.337                   | 0.684  |
| Constant                                                                                                                                                                                              | -7.652           | 1.508                       | -10.607                 | -4.696 |
| Ln Scale                                                                                                                                                                                              | 0.744            | 0.323                       | 0.111                   | 1.377  |
| Gompertz model<br>S(t) = (-Exp(FV)* (1/Gamma))*(Exp(Gamma*time)-1)<br>FV = = 0.350*HbA1c+-6.009*number of DKAs + 0.512*number of severe hypos -8.080                                                  |                  |                             |                         |        |
| HbA1c                                                                                                                                                                                                 | 0.350            | 0.170                       | 0.016                   | 0.683  |
| Number of DKAs                                                                                                                                                                                        | -6.009           | 0.562                       | -7.110                  | -4.908 |
| Number of severe hypoglycaemic events                                                                                                                                                                 | 0.512            | 0.094                       | 0.329                   | 0.696  |
| Constant                                                                                                                                                                                              | -8.080           | 1.471                       | -10.963                 | -5.197 |
| Gamma                                                                                                                                                                                                 | 1.055            | 0.669                       | -0.256                  | 2.366  |
| Log logistic model<br>S(t) = 1/ (1+(1/Exp(FV)*time)^(1/Exp(Gamma)))<br>FV = -0.181*HbA1c+2.609*number of DKAs + -0.232*number of severe hypos +3.676                                                  |                  |                             |                         |        |
| HbA1c                                                                                                                                                                                                 | -0.181           | 0.121                       | -0.418                  | 0.055  |
| Number of DKAs                                                                                                                                                                                        | 2.609            | 0.799                       | 1.044                   | 4.175  |
| Number of severe hypoglycaemic events                                                                                                                                                                 | -0.232           | 0.070                       | -0.368                  | -0.095 |
| Constant                                                                                                                                                                                              | 3.676            | 1.317                       | 1.094                   | 6.258  |
| Gamma                                                                                                                                                                                                 | -0.780           | 0.317                       | -1.401                  | -0.160 |
| Log normal model<br>S(t) = 1 – Φ ( (ln(time) – FV)/ Standard Deviation), were Φ is the standard normal distribution<br>FV = -0.190*HbA1c+ 1.617*number of DKAs + -0.283*number of severe hypos +4.117 |                  |                             |                         |        |
| HbA1c                                                                                                                                                                                                 | -0.190           | 0.107                       | -0.400                  | 0.021  |
| Number of DKAs                                                                                                                                                                                        | 1.617            | 0.517                       | 0.603                   | 2.630  |
| Number of severe hypoglycaemic events                                                                                                                                                                 | -0.283           | 0.101                       | -0.481                  | -0.086 |
| Constant                                                                                                                                                                                              | 4.117            | 1.291                       | 1.587                   | 6.647  |
| Standard Deviation                                                                                                                                                                                    | 0.066            | 0.338                       | -0.596                  | 0.728  |

---

DKA, diabetic ketoacidosis; ln, natural logarithm

Table 3: A summary of the Akaike information criterion and the Bayesian information criterion for the fitted survival curves used in the long term modelling

|             | Parametric survival model | AIC<br>(smaller is better) | BIC<br>(smaller is better) | -2*log pseudo likelihood |
|-------------|---------------------------|----------------------------|----------------------------|--------------------------|
| pumps+DAFNE | Exponential               | <b>145.77</b>              | <b>157.24</b>              | 137.77                   |
|             | Weibull                   | 146.46                     | 160.80                     | 136.46                   |
|             | Gompertz                  | 147.25                     | 161.59                     | 137.25                   |
|             | Log logistic              | 147.49                     | 161.83                     | 137.49                   |
|             | Log normal                | 148.48                     | 162.82                     | 138.48                   |
| MDI + DAFNE | Exponential               | 64.36                      | <b>75.77</b>               | 56.36                    |
|             | Weibull                   | <b>62.55</b>               | 76.81                      | 52.55                    |
|             | Gompertz                  | 63.76                      | 78.02                      | 53.76                    |
|             | Log logistic              | 63.78                      | 78.04                      | 53.78                    |
|             | Log normal                | 64.97                      | 79.23                      | 54.97                    |

AIC - Akaike information criterion; BIC - Bayesian information criterion; DAFNE – dose adjustment for normal eating; MDI – multiple daily injections;

Figure 1: A visual plot of the Kaplan-Meier and survival curves estimated from parametric models for those individuals who were randomised continuous subcutaneous insulin infusion with dose adjustment for normal eating

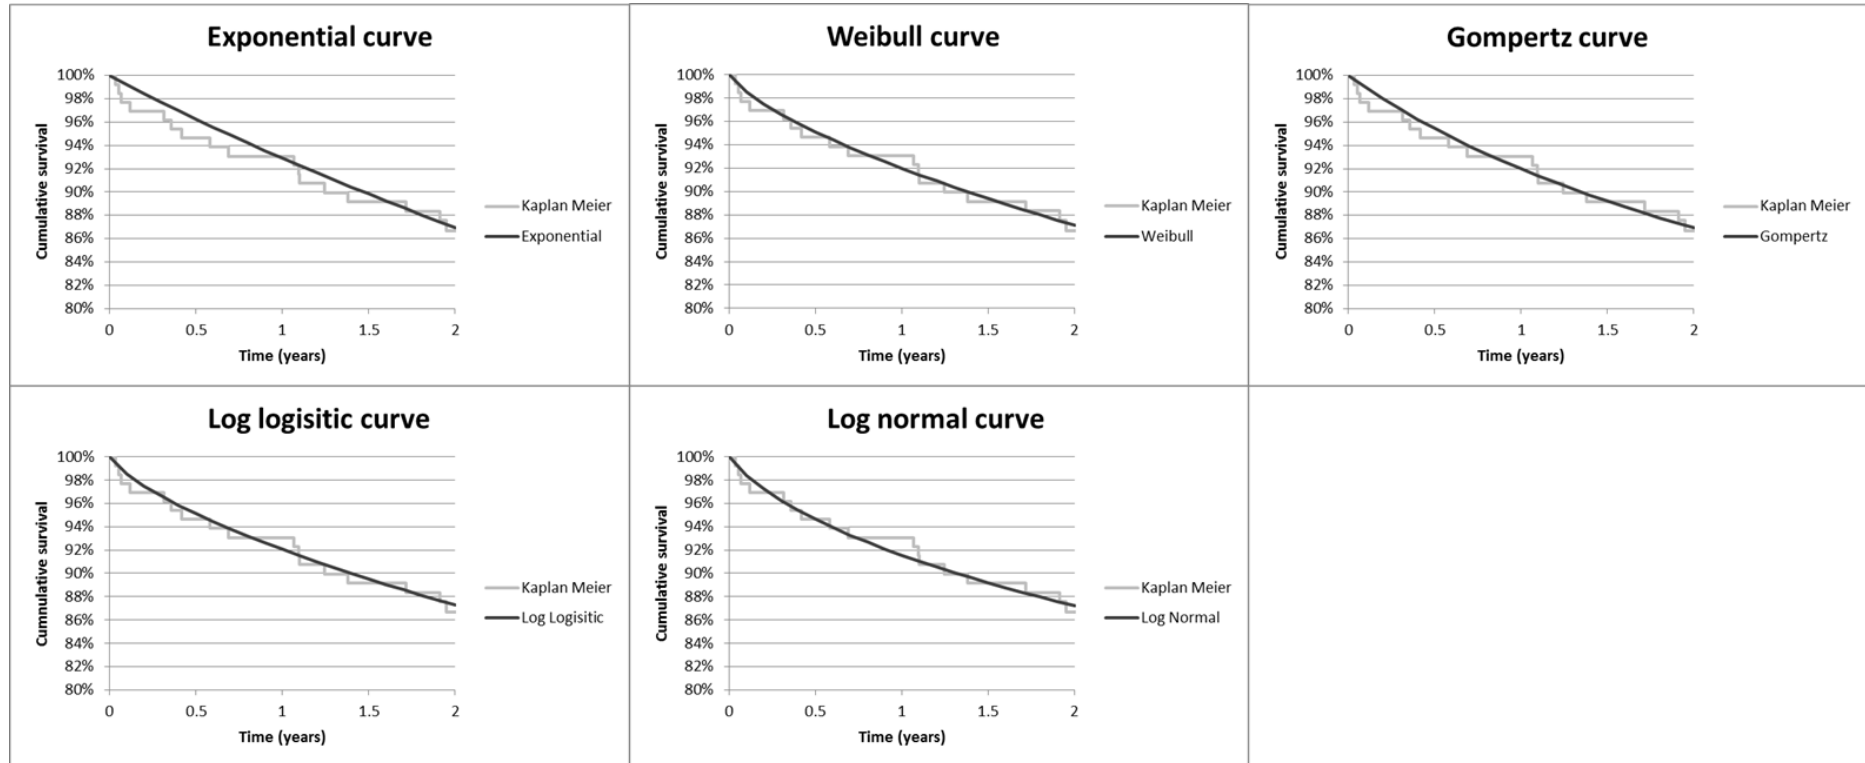

Figure 2: A visual plot of the Kaplan-Meier and survival curves estimated from parametric models for those individuals who were randomised multiple daily injections with dose adjustment for normal eating

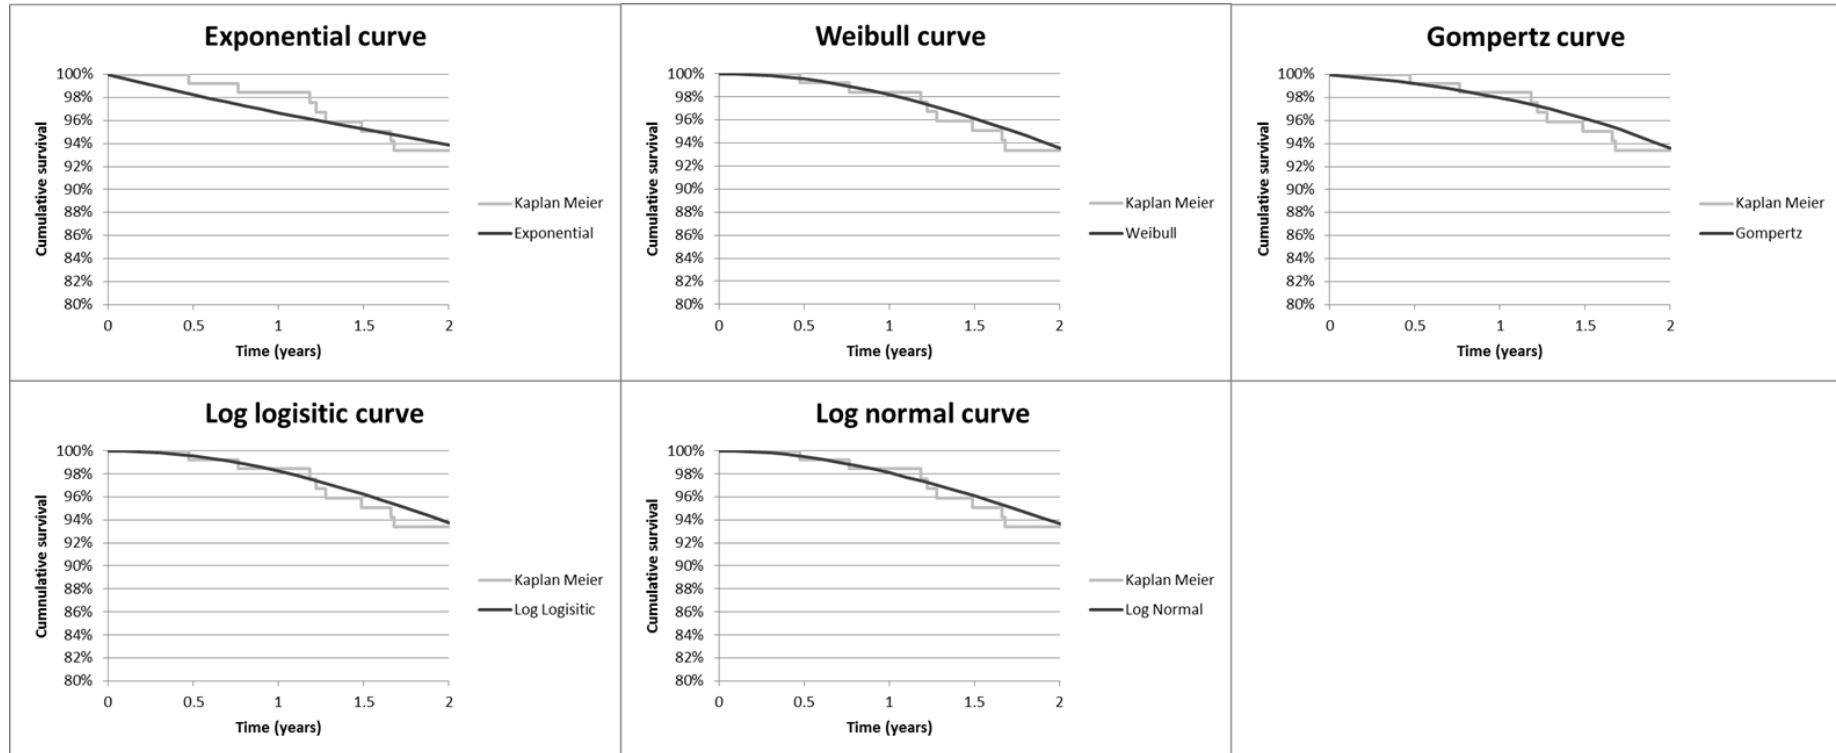

Table 4: The variance – covariance matrix for the exponential model fitted to the pumps arm

|           | HbA1c | DKAs  | Sev Hypos | Constant |
|-----------|-------|-------|-----------|----------|
| HbA1c     | 0.06  |       |           |          |
| DKAs      | 0.06  | 0.22  |           |          |
| Sev Hypos | 0.00  | 0.00  | 0.01      |          |
| Constant  | -0.51 | -0.56 | -0.02     | 4.52     |

Table 5: The variance – covariance matrix for the exponential model fitted to the multiple daily injections arm

|           | HbA1c | DKAs  | Sev Hypos | Constant |
|-----------|-------|-------|-----------|----------|
| HbA1c     | 0.03  |       |           |          |
| DKAs      | 0.00  | 0.31  |           |          |
| Sev Hypos | 0.00  | 0.01  | 0.01      |          |
| Constant  | -0.22 | -0.15 | 0.01      | 2.10     |

Table 6: The variance – covariance matrix for the weibull model fitted to the pumps arm

|                    | HbA1c | DKAs  | Sev Hypos | Constant | Ln scale parameter |
|--------------------|-------|-------|-----------|----------|--------------------|
| HbA1c              | 0.05  |       |           |          |                    |
| DKAs               | 0.06  | 0.22  |           |          |                    |
| Sev Hypos          | 0.00  | 0.00  | 0.01      |          |                    |
| Constant           | -0.49 | -0.54 | -0.04     | 4.41     |                    |
| Ln scale parameter | 0.01  | 0.04  | 0.01      | -0.15    | 0.05               |

Table 7: The variance – covariance matrix for the weibull model fitted to the multiple daily injections arm

|                    | HbA1c | DKAs  | Sev Hypos | Constant | Ln scale parameter |
|--------------------|-------|-------|-----------|----------|--------------------|
| HbA1c              | 0.03  |       |           |          |                    |
| DKAs               | 0.00  | 0.32  |           |          |                    |
| Sev Hypos          | -0.01 | 0.02  | 0.01      |          |                    |
| Constant           | -0.23 | -0.16 | -0.01     | 2.27     |                    |
| Ln scale parameter | -0.01 | 0.01  | 0.01      | -0.07    | 0.10               |

Table 8: The variance – covariance matrix for the gompertz model fitted to the pumps arm

|       | HbA1c | DKAs | Sev Hypos | Constant | Gamma |
|-------|-------|------|-----------|----------|-------|
| HbA1c | 0.06  |      |           |          |       |
| DKAs  | 0.06  | 0.22 |           |          |       |

|           |       |       |       |       |             |
|-----------|-------|-------|-------|-------|-------------|
| Sev Hypos | 0.00  | 0.00  | 0.01  |       |             |
| Constant  | -0.51 | -0.55 | -0.05 | 4.98  |             |
| Gamma     | 0.03  | 0.03  | 0.02  | -0.46 | <b>0.23</b> |

Table 9: The variance-covariance matrix for the gompertz model fitted to the multiple daily injections arm

|           | HbA1c | DKAs  | Sev Hypos | Constant | Gamma |
|-----------|-------|-------|-----------|----------|-------|
| HbA1c     | 0.03  |       |           |          |       |
| DKAs      | 0.00  | 0.32  |           |          |       |
| Sev Hypos | -0.01 | 0.02  | 0.01      |          |       |
| Constant  | -0.18 | -0.15 | -0.03     | 2.16     |       |
| Gamma     | -0.04 | 0.01  | 0.04      | -0.28    | 0.45  |

Table 10: The variance – covariance matrix for the log-logistic model fitted to the pumps arm

|           | HbA1c | DKA   | sev hypos | Constant | Gamma |
|-----------|-------|-------|-----------|----------|-------|
| HbA1c     | 0.08  |       |           |          |       |
| DKA       | 0.03  | 0.46  |           |          |       |
| sev hypos | 0.01  | -0.04 | 0.03      |          |       |
| Constant  | -0.69 | 0.02  | -0.15     | 6.30     |       |
| Gamma     | 0.01  | 0.11  | -0.01     | 0.06     | 0.05  |

Table 11: The variance – covariance matrix for the log-logistic model fitted to the multiple daily injections arm

|           | HbA1c | DKA   | sev hypos | Constant | Gamma |
|-----------|-------|-------|-----------|----------|-------|
| HbA1c     | 0.01  |       |           |          |       |
| DKA       | -0.04 | 0.64  |           |          |       |
| sev hypos | 0.00  | -0.04 | 0.00      |          |       |
| Constant  | -0.15 | 0.70  | -0.05     | 1.74     |       |
| Gamma     | -0.02 | 0.24  | -0.02     | 0.31     | 0.10  |

Table 12: The variance – covariance matrix for the log-normal model fitted to the pumps arm

|                    | HbA1c | Number of DKAs | Number of severe hypos | Constant | Standard deviation |
|--------------------|-------|----------------|------------------------|----------|--------------------|
| HbA1c              | 0.09  |                |                        |          |                    |
| DKA                | -0.01 | 0.57           |                        |          |                    |
| Sev hypos          | 0.01  | -0.06          | 0.03                   |          |                    |
| Constant           | -0.69 | 0.42           | -0.18                  | 6.35     |                    |
| Standard deviation | 0.01  | 0.11           | -0.02                  | 0.07     | 0.04               |

1

2 Table 13: The variance – covariance matrix for the log-normal model fitted to the multiple daily  
 3 injections arm

|                       | HbA1c | DKA   | Sev<br>hypos | Constant | Ln sigma<br>parameter |
|-----------------------|-------|-------|--------------|----------|-----------------------|
| HbA1c                 | 0.01  |       |              |          |                       |
| DKA                   | -0.02 | 0.27  |              |          |                       |
| Sev hypos             | 0.00  | -0.04 | 0.01         |          |                       |
| Constant              | -0.12 | 0.44  | -0.08        | 1.67     |                       |
| Ln sigma<br>parameter | -0.01 | 0.17  | -0.03        | 0.33     | 0.11                  |

4

5

6



## 5.2 HbA1c

Two beta regressions were used to estimate each individual's HbA1c in the first and second year respectively. Bounds were placed on the beta regression so that HbA1c was between the clinically plausible bounds of 29mmol/mol [4.8%] and 201 mmol/mol [20.5%]. Beta regressions estimate two parameters of interest, the mean effect and the dispersion on the variance. Treatment allocation, baseline HbA1c and centre were included as covariates for the mean effect on HbA1c after one year. Treatment allocation, baseline HbA1c, one year HbA1c and centre were included as covariates for the mean effect on HbA1c after two years. HbA1c in the previous year was used as a covariate for the dispersion parameters. The standard errors of both statistical models were adjusted for clustering within each DAFNE course. Due to presence of treatment switching, an individual's HbA1c was assumed to change as though they had been allocated to the other trial arm. Therefore, the beta regressions were estimated in the per protocol population (switchers excluded) rather than the intention to treat (ITT) population (switchers included in their randomised arm). A sensitivity analysis was conducted in which the beta regressions were estimated in the ITT population.

The results of the beta regression in the intention to treat population is given in Table 14 and the beta regression estimated in the per protocol population is given in Table 15. The results of these beta regressions are not easily interpretable as changes in HbA1c, as a logit link function is used to estimate the mean effect parameter and the natural logarithm of the dispersion parameter is estimated instead of the dispersion parameter itself.

Missing data was observed for HbA1c values in the per protocol population at 6 months (2.1% missing), 1 year (4.2% missing) and 2 years (4.2% missing). A multiple imputation procedure was employed in individuals with at least one HbA1c value (at 6 or 12 months) after randomisation but no HbA1c value at 24 months. In line with the statistical analysis plan, missing 24 month HbA1c data was imputed by multiple imputation using chained equations (regression) based on 10 imputed data sets with baseline, 6 and 12 months HbA1c measurements, DAFNE course, centre, age, sex, and HFS worry as covariates, if a participant had some HbA1c follow-up data. This imputation procedure was conducted in the ITT population, prior to running the beta regressions. After imputation 236 out of 236 participants in the per protocol population and 259 out of 260 participants in the ITT population had HbA1c follow up data.

The uncertainty in the parametric survival curves was included in the model's probabilistic sensitivity analysis using a multivariate normal distribution. The variance-covariance matrices and the predicted coefficients for each of the beta regressions were used to parameterise the multivariate normal distributions. The coefficients are given in Table 14 and Table 15 respectively and the variance – covariance matrices for each of the beta regressions is given in Table 16 to Table 19 .

Each individual's mean effect parameter and dispersion parameter were used to calculate the expected variance in that individual's actual HbA1c outcome. The individual's predicted mean effect and variance in their mean effect were used to parameterise a beta distribution. Each individual's HbA1c in the model was sampled from the beta distribution which was parameterised by their individualised mean effect and variance. This random draw was then transformed onto the Diabetes Control and Complications Trial (DCCT) (%) scale for use in the risk equations of the model.

1 Table 14: The effect of continuous subcutaneous insulin infusion compared to multiple daily  
2 injections for all individuals in the intention to treat population.

| Hba1c at one year (beta scale)                                        | Coefficient | Standard error | t      | P>t   | 95% Confidence interval |        |
|-----------------------------------------------------------------------|-------------|----------------|--------|-------|-------------------------|--------|
| Mean effect (Mu) – using a logit link function                        |             |                |        |       |                         |        |
| Treatment allocation (1= pumps + DAFNE, 0=MDI + DAFNE)                | -0.056      | 0.038          | -1.49  | 0.137 | -0.131                  | 0.018  |
| Baseline HbA1c (beta scale)                                           | 3.978       | 0.248          | 16.01  | 0     | 3.491                   | 4.465  |
| Constant                                                              | -2.223      | 0.088          | -25.28 | 0     | -2.395                  | -2.050 |
| Centre effects (Cambridge is the reference site)                      |             |                |        |       |                         |        |
| Dumfries and Galloway                                                 | -0.025      | 0.074          | -0.33  | 0.738 | -0.171                  | 0.121  |
| Edinburgh                                                             | -0.019      | 0.065          | -0.3   | 0.768 | -0.147                  | 0.108  |
| Glasgow                                                               | -0.154      | 0.099          | -1.55  | 0.12  | -0.348                  | 0.040  |
| Harrogate                                                             | 0.022       | 0.041          | 0.52   | 0.602 | -0.060                  | 0.103  |
| College Hospital - London                                             | 0.013       | 0.065          | 0.21   | 0.837 | -0.114                  | 0.140  |
| Nottingham                                                            | 0.214       | 0.060          | 3.58   | 0     | 0.097                   | 0.331  |
| Sheffield                                                             | 0.066       | 0.057          | 1.17   | 0.241 | -0.045                  | 0.178  |
| Dispersion parameter (phi) - using a natural logarithm link function  |             |                |        |       |                         |        |
| Baseline HbA1c (beta scale)                                           | -2.996862   | 0.9980645      | -3     | 0.003 | -4.954                  | -1.040 |
| Constant                                                              | 4.912       | 0.332          | 14.79  | 0     | 4.261                   | 5.563  |
| Hba1c at two years (beta scale)                                       |             |                |        |       |                         |        |
| Mean effect (Mu) – using a logit link function                        |             |                |        |       |                         |        |
| Treatment allocation(1= pumps + DAFNE, 0=MDI + DAFNE)                 | -0.018      | 0.035          | -0.52  | 0.603 | -0.086                  | 0.050  |
| One year HbA1c (beta scale)                                           | 0.797       | 0.318          | 2.51   | 0.012 | 0.175                   | 1.419  |
| Baseline HbA1c (beta scale)                                           | 3.599       | 0.342          | 10.51  | 0     | 2.927                   | 4.271  |
| Constant                                                              | -2.380      | 0.091          | -26.14 | 0     | -2.558                  | -2.201 |
| Centre effects (Cambridge is the reference site)                      |             |                |        |       |                         |        |
| Dumfries and Galloway                                                 | 0.047       | 0.093          | 0.5    | 0.617 | -0.137                  | 0.230  |
| Edinburgh                                                             | 0.067       | 0.085          | 0.8    | 0.426 | -0.098                  | 0.233  |
| Glasgow                                                               | 0.137       | 0.097          | 1.42   | 0.155 | -0.052                  | 0.327  |
| Harrogate                                                             | 0.123       | 0.087          | 1.41   | 0.158 | -0.048                  | 0.294  |
| College Hospital - London                                             | 0.079       | 0.087          | 0.9    | 0.366 | -0.092                  | 0.249  |
| Nottingham                                                            | 0.120       | 0.110          | 1.09   | 0.279 | -0.098                  | 0.337  |
| Sheffield                                                             | 0.156       | 0.080          | 1.96   | 0.05  | 0.000                   | 0.312  |
| Dispersion parameter (phi)) – using a natural logarithm link function |             |                |        |       |                         |        |
| One year HbA1c (beta scale)                                           | -4.667      | 1.129          | -4.13  | 0     | -6.881                  | -2.453 |
| Constant                                                              | 5.422       | 0.277          | 19.56  | 0     | 4.879                   | 5.966  |

MDI, multiple daily injections; DAFNE, dose adjustment for normal eating

beta scale – 0 is a HbA1c of 29 mmol/mol and 1 is a HbA1c of 201 mmol/mol

1 Table 15: The effect of continuous subcutaneous insulin infusion compared to multiple daily  
2 injections for all individuals in the per protocol population.

| Hba1c at one year (beta scale)                                       | Coefficient | Standard error | t      | P>t   | 95% Confidence interval |        |
|----------------------------------------------------------------------|-------------|----------------|--------|-------|-------------------------|--------|
| Mean effect (Mu) – using a logit link function                       |             |                |        |       |                         |        |
| Treatment allocation (1= pumps + DAFNE, 0=MDI + DAFNE)               | -0.056      | 0.044          | -1.37  | 0.171 | -0.148                  | 0.026  |
| Baseline HbA1c (beta scale)                                          | 3.938       | 0.255          | 13.62  | 0     | 2.978                   | 3.980  |
| Constant                                                             | -2.219      | 0.093          | -23.94 | 0     | -2.401                  | -2.038 |
| Centre effects<br>(Cambridge is the reference site)                  |             |                |        |       |                         |        |
| Dumfries and Galloway                                                | -0.019      | 0.078          | -0.25  | 0.805 | -0.172                  | 0.134  |
| Edinburgh                                                            | 0.020       | 0.056          | 0.37   | 0.714 | -0.089                  | 0.130  |
| Glasgow                                                              | -0.129      | 0.095          | -1.36  | 0.175 | -0.315                  | 0.057  |
| Harrogate                                                            | 0.025       | 0.040          | 0.62   | 0.534 | -0.054                  | 0.104  |
| College Hospital - London                                            | 0.018       | 0.064          | 0.28   | 0.779 | -0.107                  | 0.143  |
| Nottingham                                                           | 0.172       | 0.039          | 4.46   | 0     | 0.096                   | 0.247  |
| Sheffield                                                            | 0.084       | 0.064          | 1.31   | 0.191 | -0.042                  | 0.209  |
| Dispersion parameter (phi) - using a natural logarithm link function |             |                |        |       |                         |        |
| Baseline HbA1c (beta scale)                                          | -3.504      | 1.050          | -3.34  | 0.001 | -5.563                  | -1.446 |
| Constant                                                             | 5.062       | 0.351          | 14.41  | 0     | 4.373                   | 5.751  |
| Hba1c at two years (beta scale)                                      |             |                |        |       |                         |        |
| Mean effect (Mu) – using a logit link function                       |             |                |        |       |                         |        |
| Treatment allocation (1= pumps + DAFNE, 0=MDI + DAFNE)               | -0.047      | 0.035          | -1.35  | 0.177 | -0.116                  | 0.021  |
| One year HbA1c (beta scale)                                          | 3.475       | 0.340          | 10.23  | 0     | 2.809                   | 4.141  |
| Baseline HbA1c (beta scale)                                          | 1.053       | 0.351          | 3      | 0.003 | 0.365                   | 1.740  |
| Constant                                                             | -2.382      | 0.092          | -26.01 | 0     | -2.562                  | -2.203 |
| Centre effects<br>(Cambridge is the reference site)                  |             |                |        |       |                         |        |
| Dumfries and Galloway                                                | 0.022       | 0.088          | 0.26   | 0.799 | -0.150                  | 0.194  |
| Edinburgh                                                            | 0.076       | 0.085          | 0.89   | 0.374 | -0.091                  | 0.243  |
| Glasgow                                                              | 0.105       | 0.096          | 1.1    | 0.271 | -0.082                  | 0.293  |
| Harrogate                                                            | 0.092       | 0.085          | 1.08   | 0.28  | -0.075                  | 0.258  |
| College Hospital - London                                            | 0.053       | 0.085          | 0.62   | 0.538 | -0.115                  | 0.220  |
| Nottingham                                                           | 0.109       | 0.100          | 1.1    | 0.276 | -0.089                  | 0.308  |
| Sheffield                                                            | 0.157       | 0.078          | 2.02   | 0.043 | 0.005                   | 0.310  |
| Dispersion parameter (phi) - using a natural logarithm link function |             |                |        |       |                         |        |
| One year HbA1c (beta scale)                                          | -4.809      | 1.231          | -3.9   | 0     | -7.223                  | -2.394 |
| Constant                                                             | 5.474       | 0.302          | 18.13  | 0     | 4.882                   | 6.066  |

pumps, continuous subcutaneous insulin infusion; MDI, multiple daily injections,  
Beta scale – 0 is a HbA1c of 29 mmol/mol and 1 is a HbA1c of 201 mmol/mol

1 Table 16: The variance covariance matrix for the beta regression to predict one year HbA1c in the ITT population

|                                                                                                                                                                                                                                                             |                                  | Mu                   |                             |                       |           |         |           |                                  |            |           |          | Ln Phi                      |          |
|-------------------------------------------------------------------------------------------------------------------------------------------------------------------------------------------------------------------------------------------------------------|----------------------------------|----------------------|-----------------------------|-----------------------|-----------|---------|-----------|----------------------------------|------------|-----------|----------|-----------------------------|----------|
|                                                                                                                                                                                                                                                             |                                  | Treatment allocation | Baseline HbA1c (Beta scale) | Dumfries and Galloway | Edinburgh | Glasgow | Harrogate | King's College Hospital – London | Nottingham | Sheffield | Constant | Baseline HbA1c (Beta scale) | Constant |
| Mu                                                                                                                                                                                                                                                          | Treatment allocation             | 0.001                |                             |                       |           |         |           |                                  |            |           |          |                             |          |
|                                                                                                                                                                                                                                                             | Baseline HbA1c (Beta scale)      | 0.004                | 0.062                       |                       |           |         |           |                                  |            |           |          |                             |          |
|                                                                                                                                                                                                                                                             | Dumfries and Galloway            | -0.001               | -0.003                      | 0.006                 |           |         |           |                                  |            |           |          |                             |          |
|                                                                                                                                                                                                                                                             | Edinburgh                        | 0.000                | 0.002                       | 0.001                 | 0.004     |         |           |                                  |            |           |          |                             |          |
|                                                                                                                                                                                                                                                             | Glasgow                          | 0.001                | 0.002                       | 0.001                 | 0.001     | 0.010   |           |                                  |            |           |          |                             |          |
|                                                                                                                                                                                                                                                             | Harrogate                        | 0.000                | 0.001                       | 0.001                 | 0.001     | 0.002   | 0.002     |                                  |            |           |          |                             |          |
|                                                                                                                                                                                                                                                             | King's College Hospital – London | 0.000                | 0.004                       | 0.001                 | 0.002     | 0.002   | 0.001     | 0.004                            |            |           |          |                             |          |
|                                                                                                                                                                                                                                                             | Nottingham                       | 0.000                | -0.004                      | 0.001                 | 0.001     | 0.001   | 0.001     | 0.001                            | 0.004      |           |          |                             |          |
|                                                                                                                                                                                                                                                             | Sheffield                        | 0.000                | 0.000                       | 0.001                 | 0.001     | 0.001   | 0.001     | 0.001                            | 0.001      | 0.003     |          |                             |          |
|                                                                                                                                                                                                                                                             | Constant                         | -0.002               | -0.019                      | 0.000                 | -0.002    | -0.002  | -0.002    | -0.003                           | 0.000      | -0.001    | 0.008    |                             |          |
| Phi                                                                                                                                                                                                                                                         | Baseline HbA1c (Beta scale)      | -0.015               | -0.110                      | 0.002                 | -0.010    | -0.027  | -0.006    | -0.021                           | 0.007      | -0.007    | 0.050    | 0.996                       |          |
|                                                                                                                                                                                                                                                             | Constant                         | 0.005                | 0.038                       | 0.000                 | 0.003     | 0.009   | 0.000     | 0.004                            | 0.000      | 0.002     | -0.017   | -0.308                      | 0.110    |
| Mu – Mean effect (Mu) – using a logit link function; Ln Phi - Dispersion parameter (phi) - using a natural logarithm link function; * - 1 = pumps, 0 = multiple daily injections; Beta scale – 0 is a HbA1c of 29 mmol/mol and 1 is a HbA1c of 201 mmol/mol |                                  |                      |                             |                       |           |         |           |                                  |            |           |          |                             |          |

2

1 Table 17: The variance covariance matrix for the beta regression to predict two year HbA1c in the ITT population

|                                                                                                                                                                                                                                                             |                                  | Mu                     |                             |                             |                       |           |         |           |                                  |            |           |          | Ln Phi                      |          |
|-------------------------------------------------------------------------------------------------------------------------------------------------------------------------------------------------------------------------------------------------------------|----------------------------------|------------------------|-----------------------------|-----------------------------|-----------------------|-----------|---------|-----------|----------------------------------|------------|-----------|----------|-----------------------------|----------|
|                                                                                                                                                                                                                                                             |                                  | Treatment allocation * | One year HbA1c (beta scale) | Baseline HbA1c (Beta scale) | Dumfries and Galloway | Edinburgh | Glasgow | Harrogate | King's College Hospital - London | Nottingham | Sheffield | Constant | One year HbA1c (beta scale) | Constant |
| Mu s                                                                                                                                                                                                                                                        | Treatment allocation*            | 0.001                  |                             |                             |                       |           |         |           |                                  |            |           |          |                             |          |
|                                                                                                                                                                                                                                                             | One year HbA1c (beta scale)      | -0.001                 | 0.101                       |                             |                       |           |         |           |                                  |            |           |          |                             |          |
|                                                                                                                                                                                                                                                             | Baseline HbA1c (Beta scale)      | 0.001                  | -0.071                      | 0.117                       |                       |           |         |           |                                  |            |           |          |                             |          |
|                                                                                                                                                                                                                                                             | Dumfries and Galloway            | -0.001                 | -0.004                      | 0.002                       | 0.009                 |           |         |           |                                  |            |           |          |                             |          |
|                                                                                                                                                                                                                                                             | Edinburgh                        | 0.000                  | -0.006                      | 0.003                       | 0.006                 | 0.007     |         |           |                                  |            |           |          |                             |          |
|                                                                                                                                                                                                                                                             | Glasgow                          | 0.000                  | -0.014                      | 0.005                       | 0.006                 | 0.006     | 0.009   |           |                                  |            |           |          |                             |          |
|                                                                                                                                                                                                                                                             | Harrogate                        | 0.000                  | -0.002                      | -0.002                      | 0.006                 | 0.006     | 0.006   | 0.008     |                                  |            |           |          |                             |          |
|                                                                                                                                                                                                                                                             | King's College Hospital - London | 0.000                  | -0.002                      | 0.002                       | 0.006                 | 0.006     | 0.006   | 0.006     | 0.008                            |            |           |          |                             |          |
|                                                                                                                                                                                                                                                             | Nottingham                       | 0.000                  | -0.006                      | -0.004                      | 0.006                 | 0.006     | 0.007   | 0.006     | 0.006                            | 0.012      |           |          |                             |          |
|                                                                                                                                                                                                                                                             | Sheffield                        | 0.000                  | -0.005                      | 0.001                       | 0.006                 | 0.006     | 0.006   | 0.006     | 0.006                            | 0.006      | 0.006     |          |                             |          |
|                                                                                                                                                                                                                                                             | Constant                         | 0.000                  | -0.004                      | -0.010                      | -0.005                | -0.005    | -0.004  | -0.005    | -0.006                           | -0.004     | -0.005    | 0.008    |                             |          |
| Ln Phi                                                                                                                                                                                                                                                      | One year HbA1c (beta scale)      | -0.002                 | -0.014                      | -0.085                      | -0.020                | -0.006    | -0.002  | -0.005    | -0.010                           | -0.012     | 0.000     | 0.032    | 1.276                       |          |
|                                                                                                                                                                                                                                                             | Constant                         | 0.000                  | 0.011                       | 0.020                       | 0.005                 | 0.002     | 0.000   | 0.003     | 0.003                            | 0.003      | 0.000     | -0.010   | -0.291                      | 0.077    |
| Mu – Mean effect (Mu) – using a logit link function; Ln Phi - Dispersion parameter (phi) - using a natural logarithm link function; * - 1 = pumps, 0 = multiple daily injections; Beta scale – 0 is a HbA1c of 29 mmol/mol and 1 is a HbA1c of 201 mmol/mol |                                  |                        |                             |                             |                       |           |         |           |                                  |            |           |          |                             |          |

2

1 Table 18: The variance covariance matrix for the beta regression to predict one year HbA1c in the per protocol population

|                                                                                                                                                                                                                                                             |                                  | Mu                   |                             |                       |           |         |           |                                  |            |           |          | Ln Phi                      |          |
|-------------------------------------------------------------------------------------------------------------------------------------------------------------------------------------------------------------------------------------------------------------|----------------------------------|----------------------|-----------------------------|-----------------------|-----------|---------|-----------|----------------------------------|------------|-----------|----------|-----------------------------|----------|
|                                                                                                                                                                                                                                                             |                                  | Treatment allocation | Baseline HbA1c (Beta scale) | Dumfries and Galloway | Edinburgh | Glasgow | Harrogate | King's College Hospital – London | Nottingham | Sheffield | Constant | Baseline HbA1c (Beta scale) | Constant |
| Mu                                                                                                                                                                                                                                                          | Treatment allocation             | 0.001                |                             |                       |           |         |           |                                  |            |           |          |                             |          |
|                                                                                                                                                                                                                                                             | Baseline HbA1c (Beta scale)      | 0.004                | 0.084                       |                       |           |         |           |                                  |            |           |          |                             |          |
|                                                                                                                                                                                                                                                             | Dumfries and Galloway            | -0.001               | -0.005                      | 0.006                 |           |         |           |                                  |            |           |          |                             |          |
|                                                                                                                                                                                                                                                             | Edinburgh                        | 0.000                | 0.001                       | 0.001                 | 0.003     |         |           |                                  |            |           |          |                             |          |
|                                                                                                                                                                                                                                                             | Glasgow                          | 0.000                | 0.000                       | 0.002                 | 0.002     | 0.009   |           |                                  |            |           |          |                             |          |
|                                                                                                                                                                                                                                                             | Harrogate                        | 0.000                | 0.000                       | 0.001                 | 0.001     | 0.001   | 0.002     |                                  |            |           |          |                             |          |
|                                                                                                                                                                                                                                                             | King's College Hospital – London | 0.000                | 0.004                       | 0.001                 | 0.001     | 0.002   | 0.001     | 0.004                            |            |           |          |                             |          |
|                                                                                                                                                                                                                                                             | Nottingham                       | 0.000                | -0.002                      | 0.001                 | 0.001     | 0.002   | 0.001     | 0.001                            | 0.001      |           |          |                             |          |
|                                                                                                                                                                                                                                                             | Sheffield                        | 0.000                | -0.003                      | 0.001                 | 0.001     | 0.002   | 0.001     | 0.001                            | 0.001      | 0.004     |          |                             |          |
|                                                                                                                                                                                                                                                             | Constant                         | -0.002               | -0.024                      | 0.000                 | -0.002    | -0.002  | -0.001    | -0.002                           | -0.001     | -0.001    | 0.009    |                             |          |
| Phi                                                                                                                                                                                                                                                         | Baseline HbA1c (Beta scale)      | -0.018               | -0.117                      | -0.006                | -0.015    | -0.031  | -0.010    | -0.028                           | -0.017     | -0.016    | 0.060    | 1.103                       |          |
|                                                                                                                                                                                                                                                             | Constant                         | 0.007                | 0.040                       | 0.002                 | 0.004     | 0.010   | 0.001     | 0.006                            | 0.005      | 0.005     | -0.020   | -0.343                      | 0.123    |
| Mu – Mean effect (Mu) – using a logit link function; Ln Phi - Dispersion parameter (phi) - using a natural logarithm link function; * - 1 = pumps, 0 = multiple daily injections; Beta scale – 0 is a HbA1c of 29 mmol/mol and 1 is a HbA1c of 201 mmol/mol |                                  |                      |                             |                       |           |         |           |                                  |            |           |          |                             |          |

2

3

1 Table 19: The variance covariance matrix for the beta regression to predict two year HbA1c in the per protocol population

|                                                                                                                                                                                                                                                             |                                  | Mu                     |                             |                             |                       |           |         |           |                                  |            |           |          | Ln Phi                      |          |
|-------------------------------------------------------------------------------------------------------------------------------------------------------------------------------------------------------------------------------------------------------------|----------------------------------|------------------------|-----------------------------|-----------------------------|-----------------------|-----------|---------|-----------|----------------------------------|------------|-----------|----------|-----------------------------|----------|
|                                                                                                                                                                                                                                                             |                                  | Treatment allocation * | One year HbA1c (beta scale) | Baseline HbA1c (Beta scale) | Dumfries and Galloway | Edinburgh | Glasgow | Harrogate | King's College Hospital - London | Nottingham | Sheffield | Constant | One year HbA1c (beta scale) | Constant |
| Mu s                                                                                                                                                                                                                                                        | Treatment allocation*            | 0.001                  |                             |                             |                       |           |         |           |                                  |            |           |          |                             |          |
|                                                                                                                                                                                                                                                             | One year HbA1c (beta scale)      | -0.001                 | 0.123                       |                             |                       |           |         |           |                                  |            |           |          |                             |          |
|                                                                                                                                                                                                                                                             | Baseline HbA1c (Beta scale)      | 0.001                  | -0.075                      | 0.115                       |                       |           |         |           |                                  |            |           |          |                             |          |
|                                                                                                                                                                                                                                                             | Dumfries and Galloway            | -0.001                 | -0.005                      | 0.003                       | 0.008                 |           |         |           |                                  |            |           |          |                             |          |
|                                                                                                                                                                                                                                                             | Edinburgh                        | 0.000                  | -0.008                      | 0.005                       | 0.006                 | 0.007     |         |           |                                  |            |           |          |                             |          |
|                                                                                                                                                                                                                                                             | Glasgow                          | 0.000                  | -0.016                      | 0.007                       | 0.006                 | 0.006     | 0.009   |           |                                  |            |           |          |                             |          |
|                                                                                                                                                                                                                                                             | Harrogate                        | 0.000                  | -0.004                      | 0.000                       | 0.006                 | 0.006     | 0.006   | 0.007     |                                  |            |           |          |                             |          |
|                                                                                                                                                                                                                                                             | King's College Hospital - London | 0.000                  | -0.003                      | 0.004                       | 0.005                 | 0.005     | 0.005   | 0.005     | 0.007                            |            |           |          |                             |          |
|                                                                                                                                                                                                                                                             | Nottingham                       | 0.000                  | -0.009                      | -0.001                      | 0.005                 | 0.005     | 0.006   | 0.006     | 0.005                            | 0.010      |           |          |                             |          |
|                                                                                                                                                                                                                                                             | Sheffield                        | 0.000                  | -0.006                      | 0.001                       | 0.005                 | 0.005     | 0.006   | 0.005     | 0.005                            | 0.005      | 0.006     |          |                             |          |
|                                                                                                                                                                                                                                                             | Constant                         | 0.000                  | -0.007                      | -0.010                      | -0.005                | -0.005    | -0.003  | -0.004    | -0.005                           | -0.003     | -0.004    | 0.008    |                             |          |
| Ln Phi                                                                                                                                                                                                                                                      | One year HbA1c (beta scale)      | 0.008                  | -0.096                      | -0.044                      | -0.017                | -0.008    | 0.000   | 0.002     | -0.009                           | 0.010      | 0.004     | 0.038    | 1.516                       |          |
|                                                                                                                                                                                                                                                             | Constant                         | -0.003                 | 0.034                       | 0.009                       | 0.004                 | 0.002     | -0.002  | 0.000     | 0.002                            | -0.004     | -0.002    | -0.011   | -0.343                      | 0.091    |
| Mu – Mean effect (Mu) – using a logit link function; Ln Phi - Dispersion parameter (phi) - using a natural logarithm link function; * - 1 = pumps, 0 = multiple daily injections; Beta scale – 0 is a HbA1c of 29 mmol/mol and 1 is a HbA1c of 201 mmol/mol |                                  |                        |                             |                             |                       |           |         |           |                                  |            |           |          |                             |          |

2

### 5.3 DKA and severe hypoglycaemia

To develop the method to incorporate severe hypoglycaemic events and DKA treatment effect evidence into the model, several factors were considered. Data on severe hypoglycaemic events and DKA were collected on an ongoing basis throughout the trial. Self-reported information was also collected on the incidence of DKA. A summary of the numbers of DKAs and severe hypoglycaemic events is given in Table 20. It can be seen that the number of DKAs and severe hypoglycaemic events declines in the second year on every measure, except self-reported DKAs in the MDI+DAFNE arm where the number events was the same in both years. As such, the statistical models used in the economic data estimated the incidence of severe hypoglycaemia and DKA in the first and second years separately.



Table 20: A summary of the observed incidence of diabetic ketoacidosis and severe hypoglycaemia in the intention to treat population

|                                                        | Year 1                      |                           |                  | Year 2                      |                           |                  | Total                       |                           |                  |
|--------------------------------------------------------|-----------------------------|---------------------------|------------------|-----------------------------|---------------------------|------------------|-----------------------------|---------------------------|------------------|
|                                                        | pumps +<br>DAFNE<br>(n=132) | MDI +<br>DAFNE<br>(n=128) | Total<br>(n=260) | pumps +<br>DAFNE<br>(n=132) | MDI +<br>DAFNE<br>(n=128) | Total<br>(n=260) | pumps +<br>DAFNE<br>(n=132) | MDI +<br>DAFNE<br>(n=128) | Total<br>(n=260) |
| DKAs - Serious Adverse events                          |                             |                           |                  |                             |                           |                  |                             |                           |                  |
| Number(%)<br>participants with $\geq 1$<br>DKA         | 15(11.4%)                   | 1(0.8%)                   | 16 (6.2%)        | 4(3.0%)                     | 2(1.5%)                   | 6(2.2%)          | 17(12.9%)                   | 3(2.3%)                   | 20(7.7%)         |
| Number of hospital<br>admissions                       | 16                          | 5                         | 21               | 5                           | 4                         | 9                | 21                          | 9                         | 30               |
| DKAs - Self-reported admissions                        |                             |                           |                  |                             |                           |                  |                             |                           |                  |
| Number(%)<br>participants with $\geq 1$<br>DKA         | 17 (12.9%)                  | 6(4.7%)                   | 23 (8.8%)        | 6(4.5%)                     | 5(3.7%)                   | 11(4.1%)         | 18 (13.6%)                  | 8(6.3%)                   | 26(10.0%)        |
| Number of self-<br>reported DKAs                       | 24                          | 11                        | 35               | 7                           | 11                        | 18               | 26*                         | 13*                       | 39*              |
| Severe hypoglycaemia                                   |                             |                           |                  |                             |                           |                  |                             |                           |                  |
| Number(%)<br>participants with $\geq 1$<br>severe hypo | 10(7.6%)                    | 9(7.0%)                   | 19(7.3%)         | 4(3.0%)                     | 7(5.5%)                   | 11(4.2%)         | 14(10.6%)                   | 11(8.6%)                  | 25(9.6%)         |
| Number of severe<br>hypoglycaemic events               | 21                          | 12                        | 33               | 4                           | 12                        | 16               | 25                          | 24                        | 49               |

DAFNE, dose adjustment for normal eating; MDI, multiple daily injections; DKA, diabetic ketoacidosis; \* these values are not the sums of the one and two year follow up as some individuals had missing information in either the first or second year.

1 Negative binomial regressions were used to predict the number of DKAs, and severe hypoglycaemic  
2 events in years 1 and 2 for each outcome separately. When the outcome variable was the number of  
3 severe hypos in year 1, year 1 HbA1c and treatment group were included as covariates. When the  
4 outcome variable was the number of severe hypos in year 2, year 2 HbA1c and treatment group were  
5 included as covariates. When the outcome variable was the number of DKAs in year 1, year 1 HbA1c  
6 and treatment group were included as covariates. When the outcome variable was the number of  
7 DKAs in year 2, year 2 HbA1c and treatment group were included as covariates. The possibility of  
8 using the number of events in the previous year, baseline events for the 1 year outcomes and year 1  
9 events for the 2 year outcomes, as a covariate was explored. However, due to the low number of  
10 events, the negative binomial models often did not converge when this was included as a covariate.

11 The statistical models did not converge for DKAs reported as serious adverse events in the first year.  
12 This was not the case for self-reported DKAs and there were more self-reported cases of DKA than  
13 were picked up through the reporting of serious adverse events. Therefore, the rates of DKA were  
14 estimated using self-reported DKAs as the outcome measure.

15 The statistical models were fitted using the Zelig package in R version 3.2.0 and using specifications  
16 described above; it was used to simulate the predicted number of severe hypoglycaemia and DKA  
17 events in each trial arm 10,000 times. The simulations were separately in each trial arm and for  
18 HbA1c values every 0.1% between 4% and 20.5%. The number of events observed in the simulations  
19 was truncated at 20 events per year to reduce the effect of extreme values in the simulation on the  
20 cost-effectiveness results. These simulations were then used to determine the probability that an  
21 individual would suffer a given number of severe hypoglycaemic events and DKA events in a year,  
22 dependent on their HbA1c that year and the trial arm they were allocated to. The probability that an  
23 individual would suffer a given number of events was a fixed parameter in the PSA, therefore any  
24 differences in the rates of DKA or severe hypoglycaemia for an individual between any two model  
25 runs will solely be due to differences in their HbA1c.

26 The results of the negative binomial regressions are given in Table 21 and Table 22.

28

29 Table 21: The negative binomial model fitted to the incidence of severe hypoglycaemia at one year  
30 and two years

|                                                                                 | Coefficient | Standard error | z value | P>z     |
|---------------------------------------------------------------------------------|-------------|----------------|---------|---------|
| Severe hypoglycaemia in year 1                                                  |             |                |         |         |
| Treatment allocation (1= pumps + DAFNE, 0=MDI + DAFNE)                          | 0.2861      | 0.5149         | 0.556   | 0.578   |
| One year HbA1c (DCCT % scale)                                                   | -0.5010     | 0.2323         | 2.157   | 0.03    |
| Number of severe hypoglycaemic events experienced in the year prior to baseline | 2.0708      | 0.5638         | 3.673   | >0.000  |
| Constant                                                                        | 1.2689      | 1.8676         | 0.679   | 0.49687 |
| Severe hypoglycaemia in year 2                                                  |             |                |         |         |
| Treatment allocation (1= pumps + DAFNE, 0=MDI + DAFNE)                          | -1.1141     | 0.7202         | -1.547  | 0.122   |
| Two year HbA1c (DCCT % scale)                                                   | -0.2019     | 0.2668         | -0.757  | 0.449   |
| Constant                                                                        | -0.6367     | 2.2625         | -0.281  | 0.778   |

DAFNE, dose adjustment for normal eating, MDI, multiple daily injections

31

32 Table 22: The negative binomial model fitted to the incidence of diabetic ketoacidosis at one and two  
33 years

|                                                        | Coefficient | Standard error | z value | P>z   |
|--------------------------------------------------------|-------------|----------------|---------|-------|
| Diabetic ketoacidosis in year 1                        |             |                |         |       |
| Treatment allocation (1= pumps + DAFNE, 0=MDI + DAFNE) | 0.3369      | 0.4786         | 0.704   | 0.481 |
| One year HbA1c (DCCT % scale)                          | 0.4089      | 0.1246         | 3.283   | 0.001 |
| Constant                                               | -5.9443     | 1.1879         | -5.004  | >0.00 |
| Diabetic ketoacidosis in year 2                        |             |                |         |       |
| Treatment allocation (1= pumps + DAFNE, 0=MDI + DAFNE) | -0.07564    | 0.70426        | -0.107  | 0.914 |
| Two year HbA1c (DCCT % scale)                          | 0.32667     | 0.19447        | 1.680   | 0.093 |
| Number of DKAs in year 1                               | 0.86618     | 0.51682        | 1.676   | 0.094 |
| Constant                                               | -5.98206    | 1.82156        | -3.284  | 0.01  |

DAFNE, dose adjustment for normal eating, MDI, multiple daily injections; DKA, diabetic ketoacidosis

34

35

36

37 6 The cost of insulin, diabetes related contacts and insulin pumps used in the Sheffield Type 1  
38 Diabetes model

39 Self-reported information was collected on individual's use of insulin, face to face contacts related to  
40 their diabetes with a health care professional and telephone contacts related to their diabetes with a  
41 health care professional. Data collected on insulin use included, the type of insulin used, the dose of  
42 insulin and the method of insulin delivery. Ongoing information was also collected on whether an  
43 individual switched their insulin delivery mechanism (either pumps or MDI). The cost of the diabetes  
44 related contacts were sourced from the NHS reference costs and were £105.49 for face to face  
45 contacts and £75.80 for telephone contacts.<sup>8</sup> Insulin costs were microcosted using the data in the  
46 british national formularly and a prescription costs analysis, the full list of unit costs is given in Table  
47 23.<sup>9 10</sup> The unit costs of the pumps and their related consumables was obtained from a survey of the  
48 prices paid at the REPOSE trial sites.

49 Table 23: The unit costs of insulin

| Item                                             | Average unit cost | Number of units | Cost per unit | Associated yearly cost of an insulin pen | Source                                 |
|--------------------------------------------------|-------------------|-----------------|---------------|------------------------------------------|----------------------------------------|
| Consumables related to multiple daily injections |                   |                 |               |                                          |                                        |
| Cost of an insulin needle                        | £0.11             | N/A             | N/A           | N/A                                      | HSCIC <sup>9</sup>                     |
| Cost of an insulin syringe                       | £0.13             | N/A             | N/A           | N/A                                      | HSCIC <sup>9</sup>                     |
| Quick Acting Insulin                             |                   |                 |               |                                          |                                        |
| Human Insulin                                    |                   |                 |               |                                          |                                        |
| Vial                                             | £9.87             | 1000            | £0.01         | N/A                                      | BNF <sup>10</sup> , HSCIC <sup>9</sup> |
| Cartridges for a reusable pen                    | £18.97            | 1500            | £0.01         | £8.78                                    |                                        |
| Animal Insulin                                   |                   |                 |               |                                          |                                        |
| Vial                                             | £26.15            | 1000            | £0.03         | N/A                                      | BNF <sup>10</sup> , HSCIC <sup>9</sup> |
| Cartridges for a reusable pen                    | £38.29            | 1500            | £0.03         | £5.97                                    |                                        |
| Insulin Aspart (NovoRapid)                       |                   |                 |               |                                          |                                        |
| Vial                                             | £14.08            | 1000            | £0.01         | N/A                                      | BNF <sup>10</sup> , HSCIC <sup>9</sup> |
| Cartridges for a reusable pen                    | £28.31            | 1500            | £0.02         | £9.59                                    |                                        |
| Disposable Pen                                   | £30.63            | 1500            | £0.02         | N/A                                      |                                        |
| Insulin Lispro (Humalog)                         |                   |                 |               |                                          |                                        |
| Vial                                             | £16.61            | 1000            | £0.02         | N/A                                      | BNF <sup>10</sup> , HSCIC <sup>9</sup> |
| Cartridges for a reusable pen                    | £28.31            | 1500            | £0.02         | £8.86                                    |                                        |
| Disposable Pen                                   | £28.31            | 1500            | £0.02         | N/A                                      |                                        |
| Insulin Glulisine (Apidra)                       |                   |                 |               |                                          |                                        |
| Vial                                             | £16.00            | 1000            | £0.02         | N/A                                      | BNF <sup>10</sup> , HSCIC <sup>9</sup> |
| Cartridges for a reusable pen                    | £28.30            | 1500            | £0.02         | £7.86                                    |                                        |
| Disposable Pen                                   | £28.30            | 1500            | £0.02         | N/A                                      |                                        |

50

51 Table 23: the unit costs of insulin (continued)

| Item                          | Average unit cost | Number of units | Cost per unit | Associated yearly cost of an insulin pen | Source                                 |
|-------------------------------|-------------------|-----------------|---------------|------------------------------------------|----------------------------------------|
| Background Insulin            |                   |                 |               |                                          |                                        |
| Human Insulin                 |                   |                 |               |                                          |                                        |
| Vial                          | £10.41            | 988             | £0.01         | N/A                                      |                                        |
| Cartridges for a reusable pen | £21.52            | 1500            | £0.01         | £9.30                                    | BNF <sup>10</sup> , HSCIC <sup>9</sup> |
| Disposable Pen                | £21.05            | 1500            | £0.01         | N/A                                      |                                        |
| Animal Insulin                |                   |                 |               |                                          |                                        |
| Vial                          | £26.17            | 1000            | £0.03         | N/A                                      | BNF <sup>10</sup> , HSCIC <sup>9</sup> |
| Cartridges for a reusable pen | £38.32            | 1500            | £0.03         | £9.57                                    |                                        |
| Insulin Detemir (Levemir)     |                   |                 |               |                                          |                                        |
| Cartridges for a reusable pen | £42.00            | 1500            | £0.03         | £9.59                                    | BNF <sup>10</sup> , HSCIC <sup>9</sup> |
| Disposable Pen                | £42.10            | 1500            | £0.03         | N/A                                      |                                        |
| Insulin Glargine (Lantus)     |                   |                 |               |                                          |                                        |
| Vial                          | £30.68            | 1000            | £0.03         | N/A                                      |                                        |
| Cartridges for a reusable pen | £41.50            | 1500            | £0.03         | £7.86                                    | BNF <sup>10</sup> , HSCIC <sup>9</sup> |
| Disposable Pen                | £41.50            | 1500            | £0.03         | N/A                                      |                                        |
| Mixed Insulin                 |                   |                 |               |                                          |                                        |
| Biphasic Isophane Insulin     |                   |                 |               |                                          |                                        |
| Animal Insulin                |                   |                 |               |                                          |                                        |
| Vial                          | £25.20            | 1000            | £0.03         | N/A                                      | BNF <sup>10</sup> , HSCIC <sup>9</sup> |
| Cartridges for a reusable pen | £37.80            | 1500            | £0.03         | £5.97                                    |                                        |
| Human Insulin                 |                   |                 |               |                                          |                                        |
| Vial                          | £15.43            | 987             | £0.02         | N/A                                      | BNF <sup>10</sup> , HSCIC <sup>9</sup> |
| Cartridges for a reusable pen | £18.94            | 1500            | £0.01         | £7.74                                    |                                        |
| Disposable Pen                | £21.43            | 1500            | £0.01         | N/A                                      |                                        |
| Biphasic Insulin Aspart       |                   |                 |               |                                          |                                        |
| Cartridges for a reusable pen | £28.79            | £28.79          | £0.02         | £9.59                                    | BNF <sup>10</sup> , HSCIC <sup>9</sup> |
| Disposable Pen                | £29.89            | £29.89          | £0.02         |                                          |                                        |
| Biphasic Insulin Lispro       |                   |                 |               |                                          |                                        |
| Vial                          | £16.61            | 1000            | £0.02         |                                          |                                        |
| Cartridge for reusable pen    | £29.03            | 1500            | £0.02         | £8.93                                    | BNF <sup>10</sup> , HSCIC <sup>9</sup> |
| Disposable Pen                | £30.13            | 1500            | £0.02         |                                          |                                        |

BNF, British National Formulary; HSCIC, Health &amp; Social Care Information Centre

52

53

54 The cost of insulin, diabetes related contacts and insulin pumps (including consumables) for insulin  
55 pump therapy individuals were based on resource use data from the REPOSE trial data. It is expected  
56 that the covariates which predict the cost of insulin in year 1 may be correlated with the covariates  
57 which predict the cost of insulin in year 2. It is also expected that this may be true for the cost of  
58 diabetes related contacts and the cost of insulin pumps (including consumables). Therefore, instead of  
59 fitting six independent regression models, three seemingly unrelated regressions were fitted (one  
60 seemingly unrelated regression for the cost of insulin, another for the cost of diabetes related contacts  
61 and finally one for the cost of insulin pumps (including consumables)).

62 In the cost insulin seemingly unrelated regression model, the cost of insulin in year 1 and the cost of  
63 insulin in year 2 were used as the outcome variables for the seemingly unrelated regression model.  
64 Baseline cost of insulin, baseline HbA1c, treatment allocation, whether the individual switched from  
65 multiple daily injections to insulin pump infusion in year one and whether or not the individual  
66 switched from insulin pump infusion to multiple daily injections in year 1 were included as covariates  
67 to predict the cost of insulin in year 1. Baseline cost of insulin, baseline HbA1c, the actual method of  
68 insulin delivery that an individual was using at the end of the first year, whether the individual  
69 switched from multiple daily injections to insulin pump infusion in year two and whether or not the  
70 individual switched from insulin pump infusion to multiple daily injections in year two were included  
71 as covariates to predict the cost of insulin in year two. The standard errors were adjusted for  
72 clustering in each DAFNE course.

73 In the cost of diabetes related contacts seemingly unrelated regression model, the cost of diabetes  
74 related contacts in year 1 and the cost of diabetes related contacts in year 2 were used as the outcome  
75 variables for the seemingly unrelated regression model. Baseline cost of diabetes related contacts,  
76 baseline HbA1c, and treatment allocation; whether the individual switched from multiple daily  
77 injections to insulin pump infusion in year one and whether or not the individual switched from  
78 insulin pump infusion to multiple daily injections in year 1 were included as covariates to predict the  
79 cost of insulin in year 1. Baseline cost of diabetes related contacts, baseline HbA1c, the actual method  
80 of insulin delivery that an individual was using at the end of the first year, whether the individual  
81 switched from multiple daily injections to insulin pump infusion in year two and whether or not the  
82 individual switched from insulin pump infusion to multiple daily injections in year two were included  
83 as covariates to predict the cost of insulin in year two. The standard errors were adjusted for  
84 clustering in each DAFNE course.

85 In the cost of insulin pump seemingly unrelated regression model, the cost of insulin pumps and  
86 consumables in year 1 and the cost insulin pumps and consumables in year 2 were the two outcome  
87 variables used in the model. No control was made for baseline resource use or baseline HbA1c for  
88 either outcome variable, as no individual in the REPOSE trial had previous history of using an insulin  
89 pump. Individual's randomised treatment arm, whether or not they switched from pumps to MDI in  
90 the first year and whether or not they switched from MDI to pumps in the first year were included as  
91 covariates to predict the cost of insulin pumps and consumables in year 1. Individual's actual  
92 treatment at the end of the first year, whether or not they switched from pumps to MDI in year 2 and  
93 whether or not they switched from MDI to pumps in year 2 were included as covariates to predict the  
94 cost of insulin pumps and consumables in year 2.

95 The results of the regressions are given in main text (Table 2). The uncertainty in the costs estimated  
96 by the seemingly unrelated regressions were included in the model's PSA using a multivariate normal

97 distribution. The variance covariance matrices used to parameterise the uncertainty in the cost  
98 parameters is given in TablesTable 24 toTable 26.

99 Table 24: The variance covariance matrix for the seemingly unrelated regression on insulin costs in year 1 and 2 of REPOSE

|                       |                                         | Insulin costs year 1  |                          |                                         |                         |          | Insulin costs ongoing |                          |                                         |                         |                         |          |
|-----------------------|-----------------------------------------|-----------------------|--------------------------|-----------------------------------------|-------------------------|----------|-----------------------|--------------------------|-----------------------------------------|-------------------------|-------------------------|----------|
|                       |                                         | Baseline insulin cost | Baseline HbA1c (DCCT(%)) | Receiving CSII at the start of the year | Switch from CSII to MDI | Constant | Baseline insulin cost | Baseline HbA1c (DCCT(%)) | Receiving CSII at the start of the year | Switch from CSII to MDI | Switch from MDI to CSII | Constant |
| Insulin costs year 1  | Baseline insulin cost                   | 0.02                  |                          |                                         |                         |          |                       |                          |                                         |                         |                         |          |
|                       | Baseline HbA1c (DCCT(%))                | 0.05                  | 44.17                    |                                         |                         |          |                       |                          |                                         |                         |                         |          |
|                       | Receiving CSII at the start of the year | 0.20                  | -27.12                   | 653.72                                  |                         |          |                       |                          |                                         |                         |                         |          |
|                       | Switch from CSII to MDI                 | 3.86                  | 220.49                   | -696.50                                 | 13054.87                |          |                       |                          |                                         |                         |                         |          |
|                       | Constant                                | -7.41                 | -404.77                  | -233.28                                 | -2850.97                | 6465.05  |                       |                          |                                         |                         |                         |          |
| Insulin costs ongoing | Baseline insulin cost                   | 0.01                  | 0.17                     | -0.05                                   | 2.47                    | -6.18    | 0.01                  |                          |                                         |                         |                         |          |
|                       | Baseline HbA1c (DCCT(%))                | 0.10                  | 49.04                    | -31.68                                  | 13.16                   | -461.41  | 0.28                  | 75.98                    |                                         |                         |                         |          |
|                       | Receiving CSII at the start of the year | -0.09                 | -20.08                   | 668.10                                  | -909.54                 | -225.18  | -0.22                 | -41.08                   | 913.07                                  |                         |                         |          |
|                       | Switch from CSII to MDI                 | 0.30                  | 54.23                    | 279.72                                  | -1171.31                | -770.00  | 0.71                  | 70.30                    | 220.46                                  | 3131.19                 |                         |          |
|                       | Switch from MDI to CSII                 | 0.96                  | 14.50                    | 200.44                                  | 285.09                  | -666.29  | 1.01                  | -18.58                   | 327.56                                  | -6.80                   | 6409.60                 |          |
|                       | Constant                                | -5.61                 | -484.99                  | -153.96                                 | -391.66                 | 6527.95  | -6.52                 | -744.68                  | -201.06                                 | -1115.05                | -517.86                 | 9117.89  |

100

101



102 Table 25: The variance covariance matrix for the seemingly unrelated regression on the cost of diabetes related contacts with health care professionals in year  
103 1 and 2 of REPOSE

|                                           |                                         | Diabetes related contacts (DRC) in year 1 |                |                                         |                         |                         |          | Diabetes related contacts (ongoing) |                    |                                         |                         |                         |          |
|-------------------------------------------|-----------------------------------------|-------------------------------------------|----------------|-----------------------------------------|-------------------------|-------------------------|----------|-------------------------------------|--------------------|-----------------------------------------|-------------------------|-------------------------|----------|
|                                           |                                         | Baseline DRC cost                         | Baseline HbA1c | Receiving CSII at the start of the year | Switch from CSII to MDI | Switch from MDI to CSII | Constant | Baseline DRC cost                   | Baseline HbA1c (%) | Receiving CSII at the start of the year | Switch from CSII to MDI | Switch from MDI to CSII | Constant |
| Diabetes related contacts (DRC) in year 1 | Baseline DRC cost                       | 0.00                                      |                |                                         |                         |                         |          |                                     |                    |                                         |                         |                         |          |
|                                           | Baseline HbA1c (%)                      | -0.37                                     | 429.26         |                                         |                         |                         |          |                                     |                    |                                         |                         |                         |          |
|                                           | Receiving CSII at the start of the year | 0.90                                      | -414.71        | 4671.82                                 |                         |                         |          |                                     |                    |                                         |                         |                         |          |
|                                           | Switch from CSII to MDI                 | 1.79                                      | -3373.14       | -6556.03                                | 135705.03               |                         |          |                                     |                    |                                         |                         |                         |          |
|                                           | Switch from MDI to CSII                 | 8.01                                      | -3893.52       | 20945.51                                | -65526.50               | 401879.74               |          |                                     |                    |                                         |                         |                         |          |
|                                           | Constant                                | 2.08                                      | -3491.16       | 1632.08                                 | 32468.75                | 14206.81                | 30605.56 |                                     |                    |                                         |                         |                         |          |
| Diabetes related contacts (ongoing)       | Baseline DRC cost                       | 0.00                                      | -0.10          | 0.39                                    | -0.34                   | 3.98                    | 0.33     | 0.00                                |                    |                                         |                         |                         |          |
|                                           | Baseline HbA1c (%)                      | -0.09                                     | 154.18         | -31.36                                  | -1626.90                | -181.76                 | -1365.08 | -0.07                               | 633.97             |                                         |                         |                         |          |
|                                           | Receiving CSII at the start of the year | 0.04                                      | -111.02        | 2245.82                                 | -7211.76                | 14536.08                | 480.91   | 0.01                                | -339.62            | 4784.66                                 |                         |                         |          |
|                                           | Switch from CSII to MDI                 | 0.08                                      | 251.49         | 294.56                                  | -3310.51                | -9569.30                | -2251.13 | 0.17                                | -570.77            | -1568.74                                | 4477.66                 |                         |          |
|                                           | Switch from MDI to CSII                 | 0.95                                      | -28.09         | 174.70                                  | -9237.83                | 3330.56                 | -448.54  | 0.87                                | -926.86            | 2204.36                                 | 2044.24                 | 23540.78                |          |
|                                           | Constant                                | 0.67                                      | -1479.09       | -339.05                                 | 22162.60                | -1783.64                | 13811.74 | 0.06                                | -5516.22           | 1364.46                                 | 4819.50                 | 4946.57                 | 50120.60 |

106 Table 26: The variance covariance matrix for the seemingly unrelated regression on the cost of insulin pumps and associated consumables in year 1 and 2 of  
 107 REPOSE

|                                              |                                         | Insulin pump and consumables costs (year 1) |                         |                         |           | Insulin pump and consumables costs (ongoing) |                         |                         |          |
|----------------------------------------------|-----------------------------------------|---------------------------------------------|-------------------------|-------------------------|-----------|----------------------------------------------|-------------------------|-------------------------|----------|
|                                              |                                         | Receiving CSII at the start of the year     | Switch from CSII to MDI | Switch from MDI to CSII | Constant  | Receiving CSII at the start of the year      | Switch from CSII to MDI | Switch from MDI to CSII | Constant |
| Insulin pump and consumables costs (year 1)  | Receiving CSII at the start of the year | 241.41                                      |                         |                         |           |                                              |                         |                         |          |
|                                              | Switch from CSII to MDI                 | 1990.29                                     | 82619.62                |                         |           |                                              |                         |                         |          |
|                                              | Switch from MDI to CSII                 | 16.58                                       | -627.60                 | 43661.77                |           |                                              |                         |                         |          |
|                                              | Constant                                | 1.41E-04                                    | 0.01                    | -5.10E-04               | 1.40E-08  |                                              |                         |                         |          |
| Insulin pump and consumables costs (ongoing) | Receiving CSII at the start of the year | 200.78                                      | 718.30                  | 180.58                  | -3.30E-04 | 190.07                                       |                         |                         |          |
|                                              | Switch from CSII to MDI                 | 361.04                                      | -89.20                  | -528.03                 | -0.01     | 535.66                                       | 51325.97                |                         |          |
|                                              | Switch from MDI to CSII                 | -3.84                                       | 3.83                    | -4213.99                | 4.38E-04  | -30.22                                       | 24.09                   | 23307.42                |          |
|                                              | Constant                                | -4.20E-04                                   | 0.01                    | -1.24E-03               | 1.53E-08  | -8.70E-04                                    | -0.01                   | 1.52E-03                | 2.02E-08 |

108

## 7 Detailed results of the scenario and subgroup analyses

Table 27: The One way scenario analyses and subgroup analyses performed using the Sheffield Type 1 Diabetes Policy Model

|                                                                                                                       | MDI + DAFNE            |                        | pumps + DAFNE          |                        | Incremental            |                        |                          |
|-----------------------------------------------------------------------------------------------------------------------|------------------------|------------------------|------------------------|------------------------|------------------------|------------------------|--------------------------|
|                                                                                                                       | Total discounted costs | Total discounted QALYs | Total discounted costs | Total discounted QALYs | Total discounted costs | Total discounted QALYs | ICER (£ per QALY gained) |
| Base Case - PSA                                                                                                       | £81,785                | 12.98                  | £100,617               | 13.11                  | £18,832                | 0.13                   | £149,483                 |
| Base Case - Deterministic                                                                                             | £73,963                | 12.81                  | £93,236                | 12.98                  | £19,273                | 0.18                   | £109,684                 |
| Scenario - Pump prices were estimated from Riemsma et al. <sup>11</sup>                                               | £73,912                | 12.81                  | £92,414                | 12.98                  | £18,502                | 0.18                   | £105,295                 |
| Scenario - 25% price reduction in insulin pumps and consumables                                                       | £73,513                | 12.81                  | £85,939                | 12.98                  | £12,426                | 0.18                   | £70,715                  |
| Scenario - 50% price reduction in insulin pumps and consumables                                                       | £73,063                | 12.81                  | £78,641                | 12.98                  | £5,578                 | 0.18                   | £31,747                  |
| Scenario – Intention to treat estimate of treatment effect                                                            | £74,200                | 12.90                  | £94,400                | 12.96                  | £20,200                | 0.06                   | £316,785                 |
| Scenario - Intention to treat estimate of treatment effect and no change in HbA1c if an individual switches treatment | £73,308                | 12.93                  | £93,496                | 12.96                  | £20,188                | 0.04                   | £534,397                 |
| Scenario – Base case & no change in HbA1c when switching                                                              | £73,799                | 12.86                  | £93,329                | 12.95                  | £19,530                | 0.09                   | £207,874                 |
| Scenario – Post-trial HbA1c progression in both arms is estimated from the DCCT                                       | £74,278                | 12.83                  | £92,865                | 13.00                  | £18,586                | 0.18                   | £106,126                 |
| Scenario - Individuals return to their baseline HbA1c after 3 years and no progression thereafter                     | £70,053                | 13.10                  | £91,063                | 12.99                  | £21,011                | -0.10                  | Dominated                |
| Scenario - HbA1c effects occur one model cycle earlier                                                                | £75,015                | 12.78                  | £93,276                | 12.92                  | £18,262                | 0.14                   | £130,208                 |
| Scenario – individuals return to their baseline risk of hypos and DKA at three years                                  | £73,716                | 12.86                  | £95,012                | 12.83                  | £21,296                | -0.02                  | Dominated                |
| Scenario - Switching probabilities were estimated directly from the Kaplan - Meier curves                             | £73,516                | 12.83                  | £93,911                | 12.94                  | £20,394                | 0.12                   | £172,836                 |
| Scenario – The utility decrement for blindness was estimated from the Brown <i>et al.</i> study. <sup>12</sup>        | £73,963                | 12.80                  | £93,236                | 12.97                  | £19,273                | 0.18                   | £110,115                 |

Table 27: The One way scenario analyses and subgroup analyses performed using the Sheffield Type 1 Diabetes Policy Model (continued)

|                                                                                  | MDI + DAFNE            |                        | pumps + DAFNE          |                        | Incremental            |                        |                          |
|----------------------------------------------------------------------------------|------------------------|------------------------|------------------------|------------------------|------------------------|------------------------|--------------------------|
|                                                                                  | Total discounted costs | Total discounted QALYs | Total discounted costs | Total discounted QALYs | Total discounted costs | Total discounted QALYs | ICER (£ per QALY gained) |
| Subgroup - individuals with a baseline HbA1c < 8.5%                              | £57,947                | 13.38                  | £79,001                | 13.42                  | £21,054                | 0.04                   | £547,504                 |
| Subgroup- individuals with a baseline HbA1c ≥ 8.5%                               | £85,028                | 12.32                  | £103,990               | 12.40                  | £18,962                | 0.07                   | £253,352                 |
| Subgroup - individuals with a baseline HbA1c ≥ 7.5%                              | £76,735                | 12.58                  | £95,481                | 12.74                  | £18,746                | 0.16                   | £120,239                 |
| Subgroup - Individuals with a baseline HbA1c ≥ 7.5% & <8.5%                      | £61,207                | 13.07                  | £82,337                | 13.19                  | £21,131                | 0.12                   | £176,887                 |
| Subgroup - Individuals with a baseline HbA1c ≥ 8.5% & <9.5%                      | £66,520                | 13.47                  | £86,105                | 13.60                  | £19,584                | 0.13                   | £148,240                 |
| Subgroup - Individuals with a baseline HbA1c ≥ 9.5%                              | £99,249                | 11.64                  | £115,473               | 11.81                  | £16,224                | 0.17                   | £96,231                  |
| Subgroup - Individuals in the per protocol population                            | £72,955                | 12.72                  | £92,351                | 12.88                  | £19,395                | 0.17                   | £115,786                 |
| Subgroup - Individuals in the per protocol population and no treatment switching | £70,975                | 12.78                  | £95,905                | 12.86                  | £24,929                | 0.09                   | £286,769                 |

MDI - multiple daily injections; DAFNE - dose adjustment for normal eating; pumps; ICER - incremental cost-effectiveness ratio; PSA - probabilistic sensitivity analysis; DCCT - Diabetes Control and Complications Trial

## References

1. Office for National Statistics. National Life Tables, United Kingdom : 2012–2014. *Online Source* 2016;Available from: <http://www.ons.gov.uk/peoplepopulationandcommunity/birthsdeathsandmarriages/lifeexpectancies/bulletins/nationallifetablesunitedkingdom/previousReleases> . (Last Accessed: 17/03/2016)
2. Office for National Statistics. Deaths Registered in England and Wales (Series DR). Table 5 for years 2014, 2013 and 2012. *Online Source* 2015;Available from: <http://www.ons.gov.uk/peoplepopulationandcommunity/birthsdeathsandmarriages/deaths/datasets/deathsregisteredinenglandandwalesseriesdrreferencetables/> Last Accessed: 17/03/2016)
3. National Records of Scotland. Vital Events Reference Tables. *Online Source* 2015;Available from: <http://www.nrscotland.gov.uk/statistics-and-data/statistics/statistics-by-theme/vital-events/general-publications/vital-events-reference-tables/2014/> Last Accessed 17/03/2016)
4. Northern Ireland Statistics and Research Agency. Microdata for Deaths in Northern Ireland, 2001-2014. *Online Source* 2014;Available from: [http://www.nisra.gov.uk/archive/demography/publications/births\\_deaths/Pivot\\_Table\\_2001\\_2014.xlsx](http://www.nisra.gov.uk/archive/demography/publications/births_deaths/Pivot_Table_2001_2014.xlsx) Last Accessed 17/03/2016)
5. Heller S, Lawton J, Amiel S, et al. Improving management of type 1 diabetes in the UK: the Dose Adjustment For Normal Eating (DAFNE) programme as a research test-bed. A mixed-method analysis of the barriers to and facilitators of successful diabetes self-management, a health economic analysis, a cluster randomised controlled trial of different models of delivery of an educational intervention and the potential of insulin pumps and additional educator input to improve outcomes. *Programme grants for applied research* 2014;2(5) doi: 10.3310/pgfar02050
6. Wolfe RA, Ashby VB, Milford EL, et al. Comparison of mortality in all patients on dialysis, patients on dialysis awaiting transplantation, and recipients of a first cadaveric transplant. *N Engl J Med* 1999;341(23):1725-30. doi: 10.1056/NEJM199912023412303
7. Briggs A, Claxton K, Sculpher M. Decision Modelling for Health Economic Evaluation. Oxford: Oxford University Press 2006.
8. Department of Health. NHS reference costs 2013 to 2014. *Online Source* 2014;Available from: <https://www.gov.uk/government/publications/nhs-reference-costs-2013-to-2014>. Last accessed 17th July 2015
9. Health & Social Care Information Centre. Prescription Cost Analysis England 2014. *Online Source* 2015;Available from; <http://www.hscic.gov.uk/catalogue/PUB17274>. Last Accessed 2nd November 2015
10. British Medical Association and Royal Pharmaceutical Society of Great Britain. British National Formulary August 2015. *Online Source* 2015;Available from: <https://www.medicinescomplete.com>, Last Accessed 9th September 2015
11. Riemsma R, Corro Ramos I, Birnie R, et al. Type 1 diabetes: Integrated sensor-augmented pump therapy systems for managing blood glucose levels (The MiniMed Paradigm Veo System and the Vibe and G4 PLATINUM CGM system), a systematic review and economic evaluation. *Kleijnen Systematic Reviews Ltd* 2015
12. Brown MM, Brown GC, Sharma S, et al. Quality of life with visual acuity loss from diabetic retinopathy and age-related macular degeneration. *Arch Ophthalmol* 2002;120(4):481-4.
